# Supplementary material
Source: PubMed Central journal article supplement (PMC2662746)

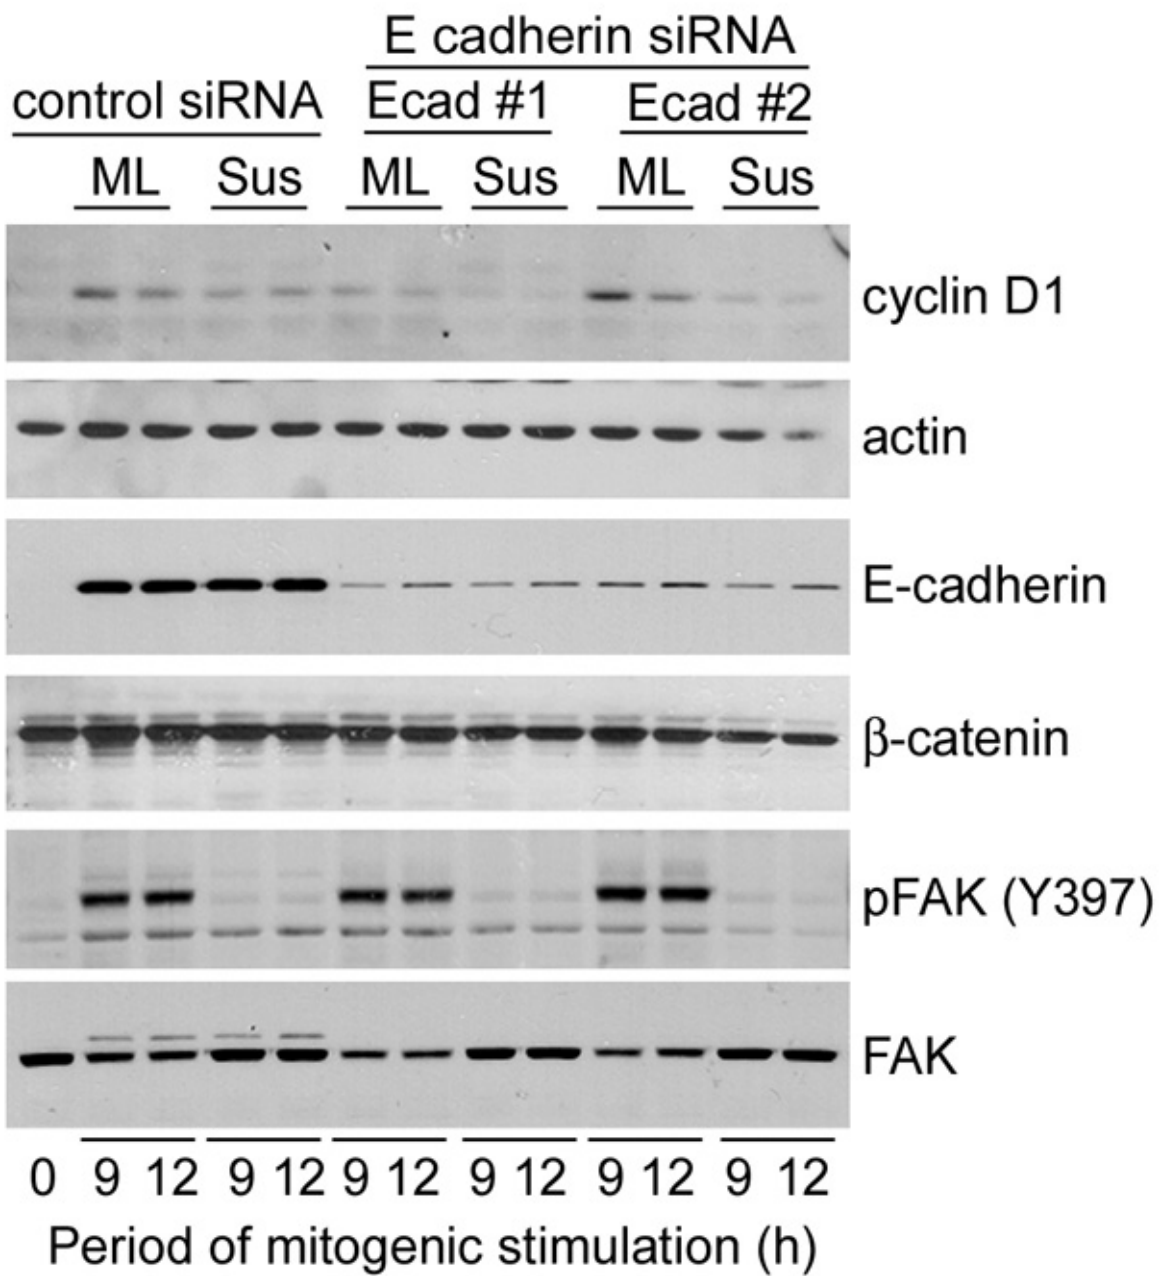

Supplement: NIHMS93767-supplement-fig_S1.pdf [file NIHMS93767-supplement-fig_S1.pdf]

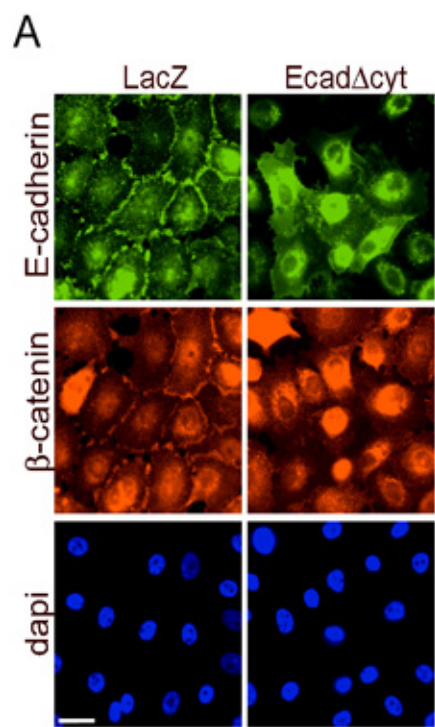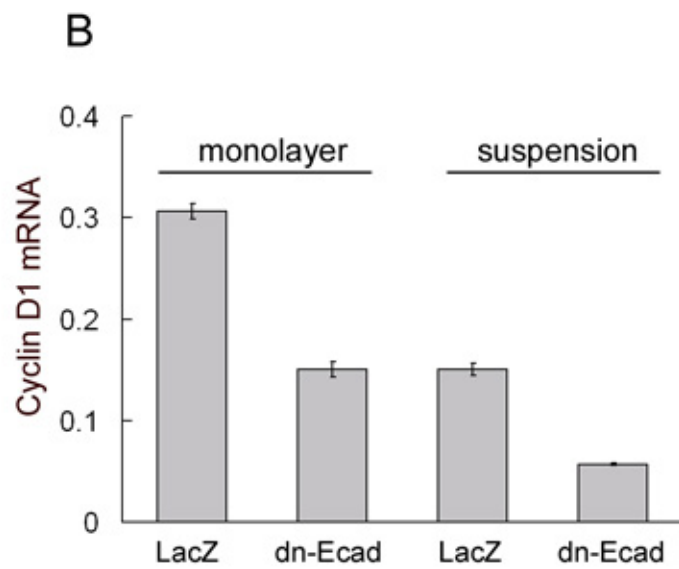

Supplement: NIHMS93767-supplement-fig_S2.pdf [file NIHMS93767-supplement-fig_S2.pdf]
